# Supplementary material for: Structure-guided development of a high-affinity human Programmed Cell Death-1: Implications for tumor immunotherapy
Source: PubMed Central journal article supplement (PMC5360572; doi:10.1016/j.ebiom.2017.02.004), 2017-02-06

**Supplementary Table 1. Crystallographic data collection, phasing and refinement statistics.**

| <b>Data sets</b>                               | <b>huPD-1 (A132L)</b>      |
|------------------------------------------------|----------------------------|
| <b>PDB ID</b>                                  | <b>3RRQ</b>                |
| <b>Source</b>                                  | NLSL X29A                  |
| <b>Data collection</b>                         |                            |
| Space Group                                    | P 65 2 2                   |
| Cell dimension                                 |                            |
| <i>a</i> , <i>b</i> , <i>c</i> (Å)             | 46.02, 46.02, 187.39       |
| $\alpha$ , $\beta$ , $\gamma$ (°)              | 90.0, 90.0, 120.0          |
| Wavelength (Å)                                 | 0.979                      |
| Resolution (Å)                                 | 36.68-2.1                  |
| Observed reflections                           | 132630                     |
| Unique reflections                             | 7612                       |
| Completeness, %                                | 99.9 (100) <sup>1</sup>    |
| $R_{\text{merge}}$                             | 0.066 (0.572) <sup>1</sup> |
| Average $I/\sigma I$                           | 45.3 (5.8) <sup>1</sup>    |
| <b>Search probes for molecular replacement</b> |                            |
|                                                | Mouse PD-1 (1NPU)          |
| <b>Refinement statistics</b>                   |                            |
| Resolution (Å)                                 | 2.1                        |
| No. reflections (work/test)                    | 7526/350                   |
| $R_{\text{work}}/R_{\text{free}}$ (5% of data) | 0.214/0.249                |
| <b>Number of atoms</b>                         |                            |
| Protein                                        | 868                        |
| Solvent (H <sub>2</sub> O)                     | 35                         |
| <b>RMS deviations</b>                          |                            |
| Bond length, Å                                 | 0.013                      |
| Bond angles, °                                 | 1.501                      |
| <b>Mean B values, (Å<sup>2</sup>)</b>          |                            |
| Main Chain                                     | 47.96                      |
| Side Chain/Water                               | 49.90                      |
| <b>Ramachandran plot (MolProbity)</b>          |                            |
| Favored, %                                     | 95.3                       |
| Allowed, %                                     | 97.2                       |
| Outliers, %                                    | 2.8                        |

<sup>1</sup> Values in parentheses correspond to highest resolution shell.

## Supplementary Figure Legends

**Supplementary Figure 1. Substitution of A132 to hydrophobic residues in human PD-1 increases binding to both PD-L1 and PD-L2.** Wild-type and mutant PD-1 were expressed in HEK293 cells and binding to PD-L1 and PD-L2 Ig was determined by flow cytometry. Data are normalized to wild-type PD-1 binding. Data are representative of three independent experiments.

**Supplementary Figure 2. Homology of PD-L1 and PD-L2 sequences from various species.** Structural annotations are based on the human PD-L1 (PDB Code) and mouse PD-L2 (PDB code) structures. Asterisks are used to indicate residues in the binding interface, triangles indicated potential N-glycosylation sites.

**Supplementary Figure 3. Binding affinities of wild type and A132L mutant human PD-1 to PD-L1 and PD-L2.** SPR data and equilibrium dissociation constants between immobilized human PD-L1 and **(A)** soluble wild type, or **(B)** soluble A132L mutant PD-1, as well as immobilized human PD-L2 and **(C)** wild-type or **(D)** A132L mutant PD-1.  $K_d$ s are shown in  $\mu\text{M}$ , standard errors from data fitting are shown. Data are representative of two independent experiments.

**Supplementary Figure 4. Cross-reactivity between mouse and human PD-1 in binding to PD-Ligands.** Equilibrium binding dissociation constants were determined by SPR using immobilized mouse PD-L1 and **(A)** mouse PD-1, or **(B)** human PD-1; immobilized human PD-L1 and **(C)** human PD-1 or **(D)** mouse PD-1; immobilized mouse PD-L2 and **(E)** mouse PD-1,

or (F) human PD-1, as well as immobilized human PD-L2 and (G) human PD-1, or (H) mouse PD-1. K<sub>d</sub>-s are shown in  $\mu\text{M}$ , standard errors from Langmuir data fitting are shown.

**Supplementary Figure 5. Design of a soluble chimeric high-affinity (HA) PD-1 Ig fusion protein.** (A) Overall architecture of the Ig fusion constructs: wild-type or mutant PD-1 ectodomains were fused to the hexa-His-tagged Fc segment of human IgG1. (B-C) Binding of wild-type and mutant PD-1 Ig to human PD-L1 (B) and PD-L2 (C), and mouse PD-L1 (D) and PD-L2 (E). Full-length PD-Ligands were expressed in HEK293 cells, binding was detected by flow cytometry. K78A (NB) PD-1 Ig was used as negative control. Data are representative of 3 independent experiments.

**Supplementary Figure 6. Phenotypic characteristics of mature human dendritic cells differentiated from monocytes.** (A) Increased expression of MHC class II, CD11c, PD-L1, PD-L2, CD83 and B7-1 and lack of expression of CD14 indicates formation of mature dendritic cells from monocytes, upon culture in the presence of GM-CSF and IL-4, and activation with TNF- $\alpha$ . (B) Monocytes are CD11c and CD14 positive, MHC class II, B7-1 and PD-L1 low, PD-L2 and CD83 negative. Representative FSC-SSC plots and gating strategy are shown for each cell type.

**Supplementary Figure 7. HA PD-1 Ig dose-dependently increases T cell cytokine secretion after allogeneic activation.** Representative data for interferon- $\gamma$  (A), TNF- $\alpha$  (B), IL-5 (C) and IL-13 (D) are shown. HA PD-1 Ig stimulates cytokine production starting at 0.5  $\mu\text{g/ml}$ , no significant effect was observed for wild-type PD-1 at either 0.5 or 5  $\mu\text{g/ml}$ . Data

from one representative experiment are shown as replicates of four, error bars represent standard errors of mean.

**Supplementary Figure 8. 3LL cells express PD-L1, but not PD-L2.** 3LL cells were stained with monoclonal antibody to PD-L1 (A) and PD-L2 (B) and analyzed by flow cytometry. Antibody staining is shown in bold histogram, isotype control as regular histogram. Numbers indicate geometric mean fluorescence intensities of specific antibody staining versus isotype control.

**Supplementary Figure 9. Flow cytometry analysis of the tumor microenvironment. (A)** Surface markers on tumor DC detected by flow cytometry, reported as mean fluorescence intensity (MFI). **(B).** Percentage of PD-L1 expression on tumor cells. **(C)** Percentage of tumor infiltrating CD8<sup>+</sup> lymphocytes (TIL) analyzed by flow cytometry. Single dots indicate individual mice (n=3-4/group). Data are represented as mean, SD; \* p<0.05, \*\* p<0.01, \*\*\* p<0.001 (Student's *t* test).

Suppl Fig 1

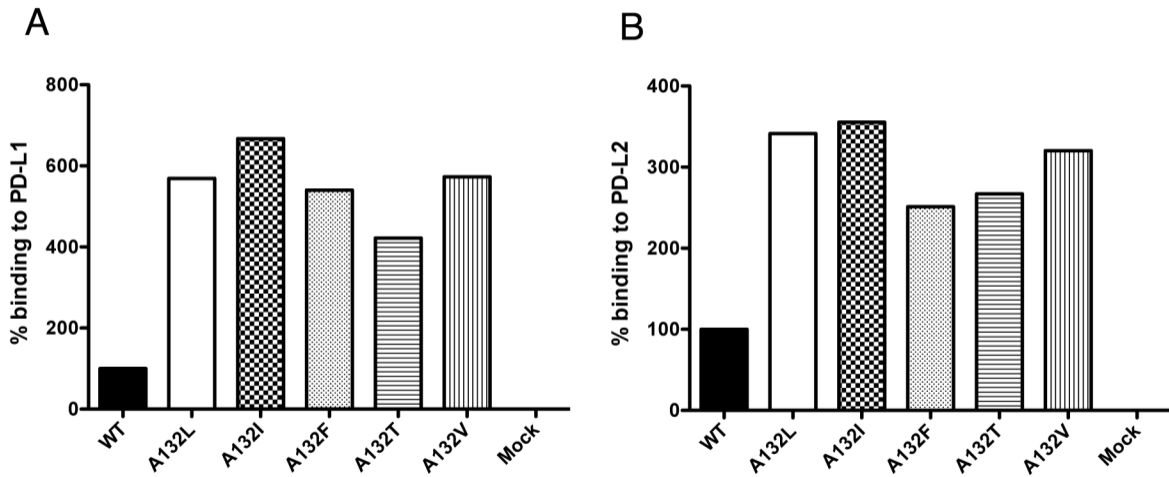

## Suppl Fig 2

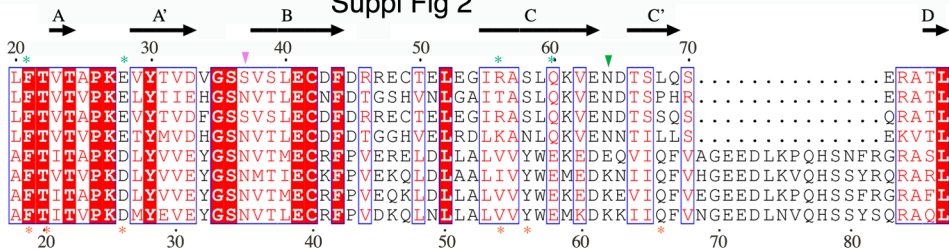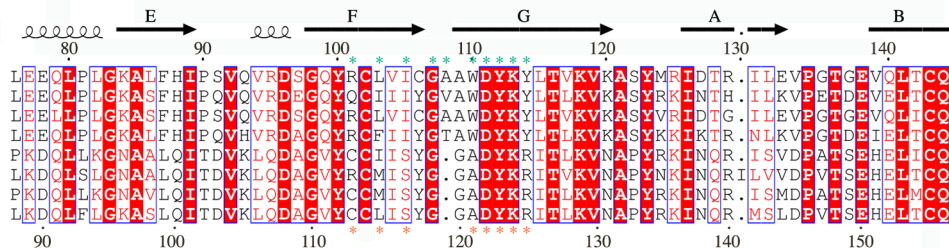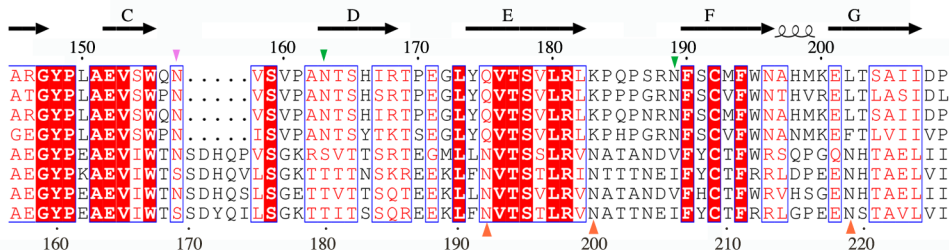

# Suppl Fig 3

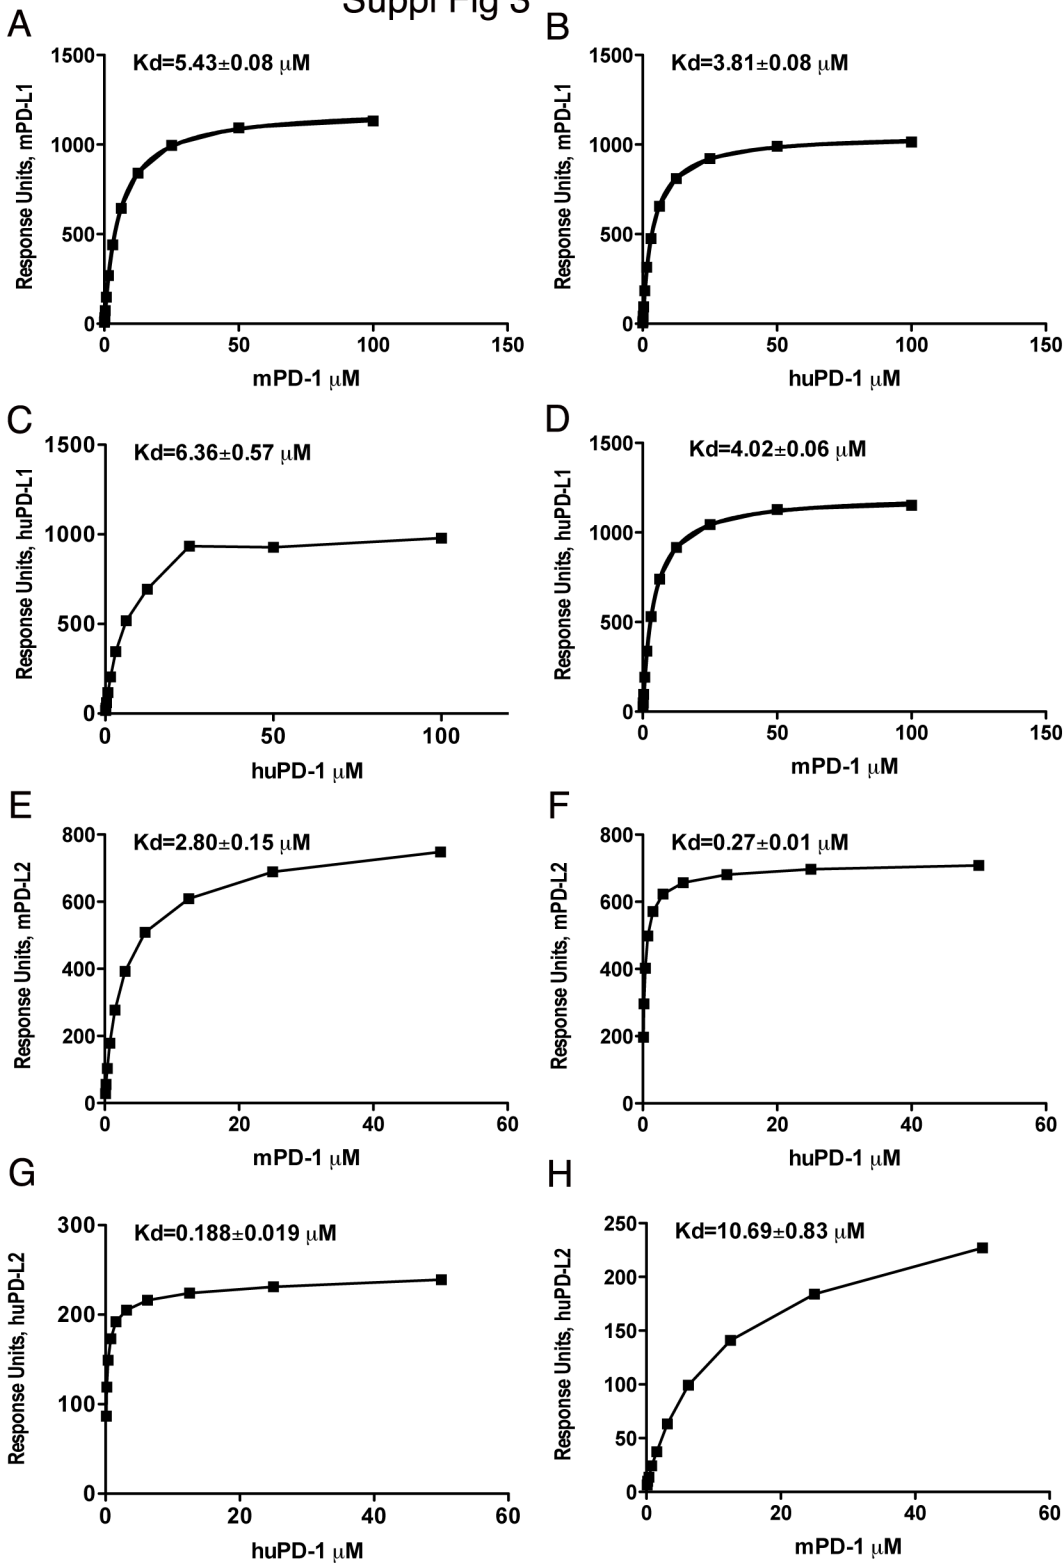

Suppl Fig 4

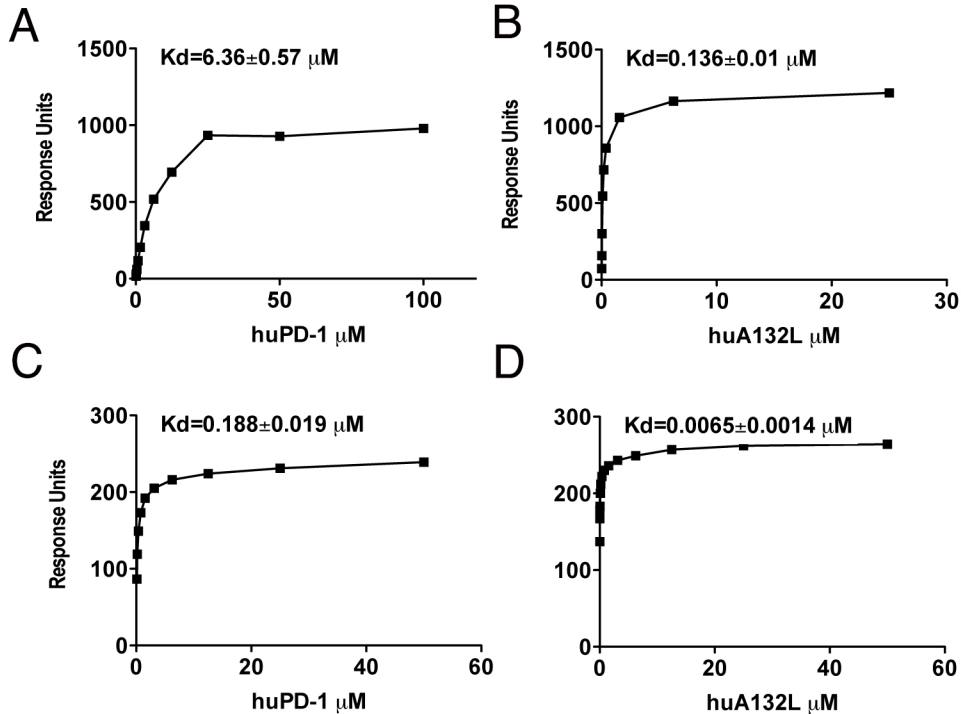



# Suppl Fig 5

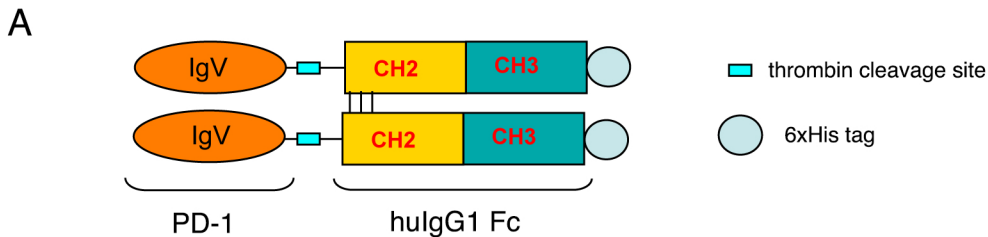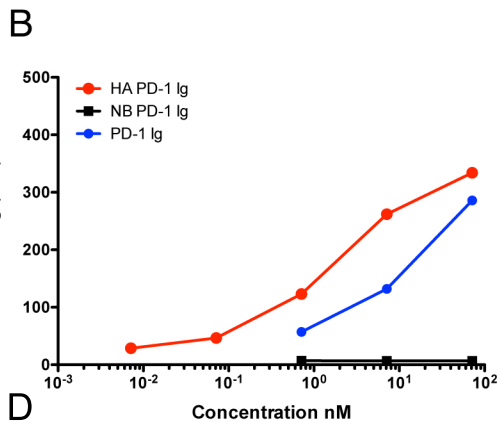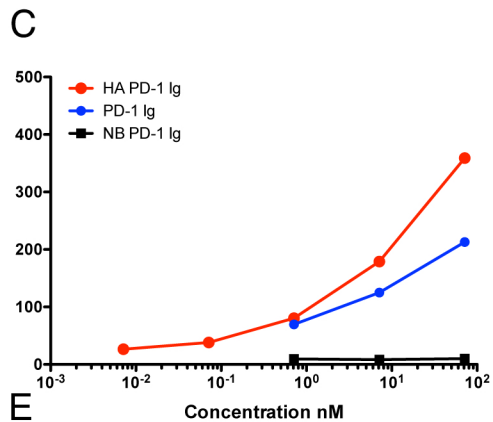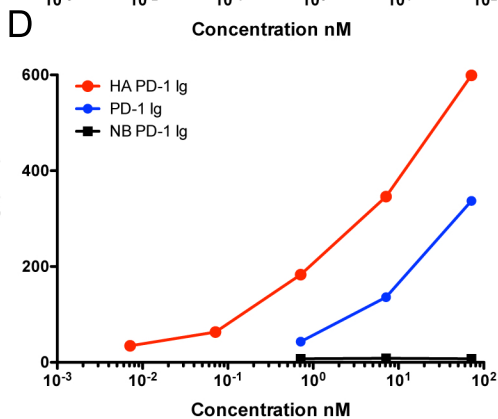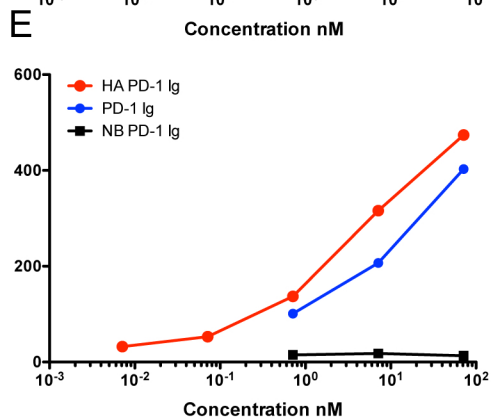

# A

## Mature DC

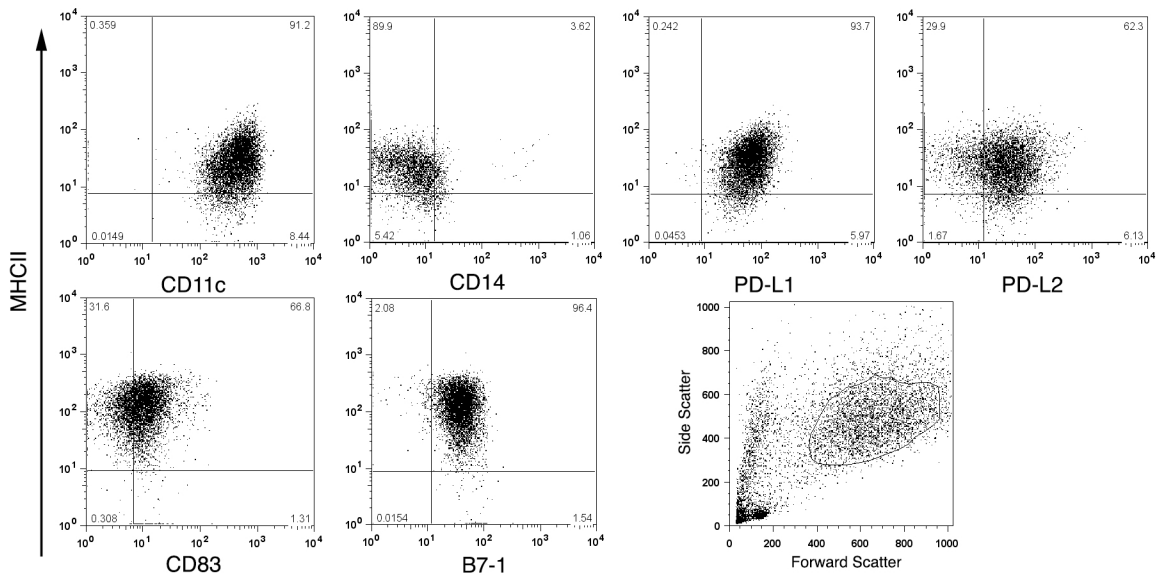

# B

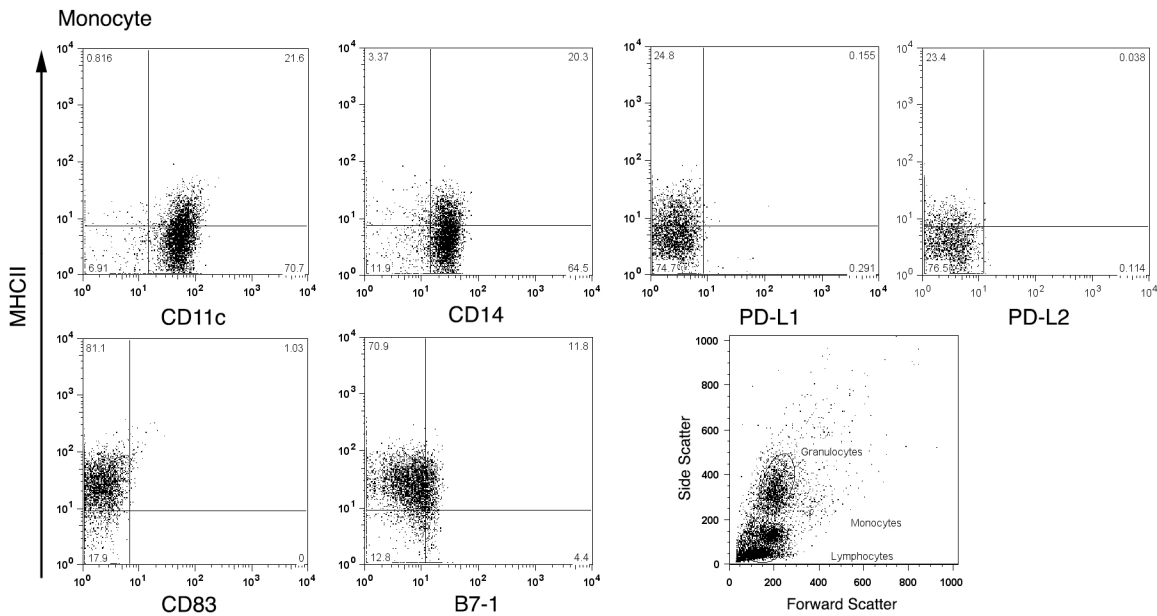

Suppl Fig 7

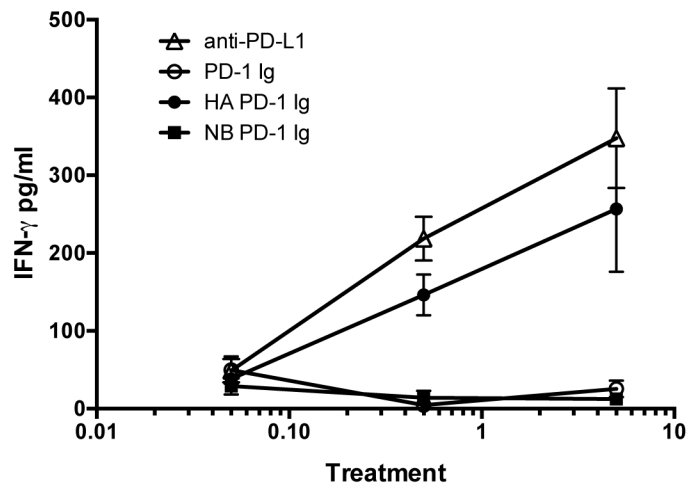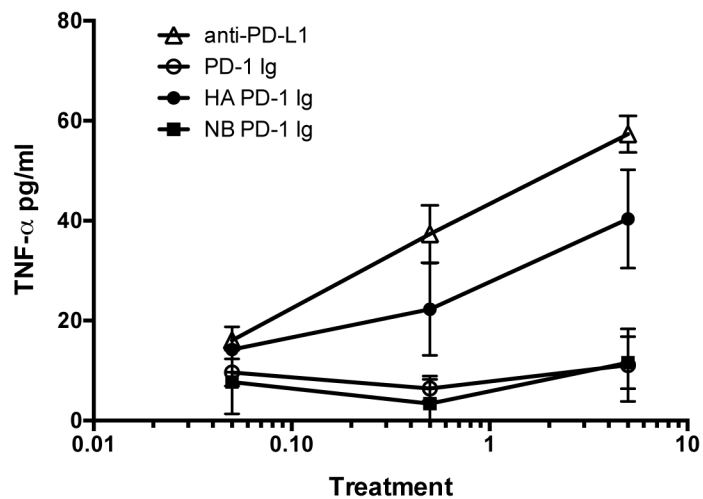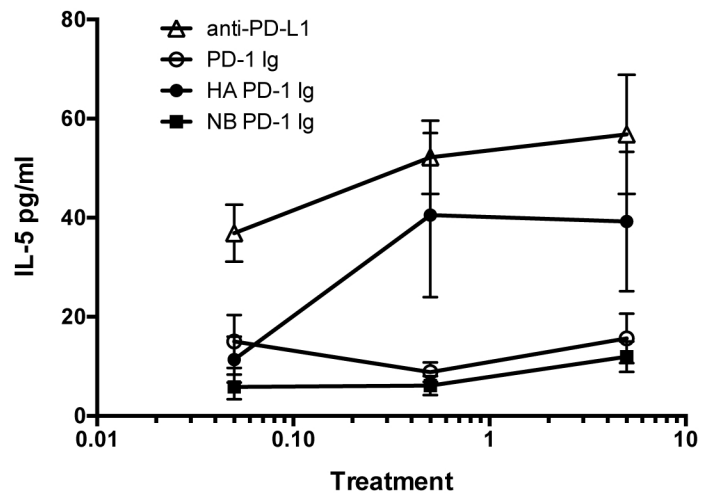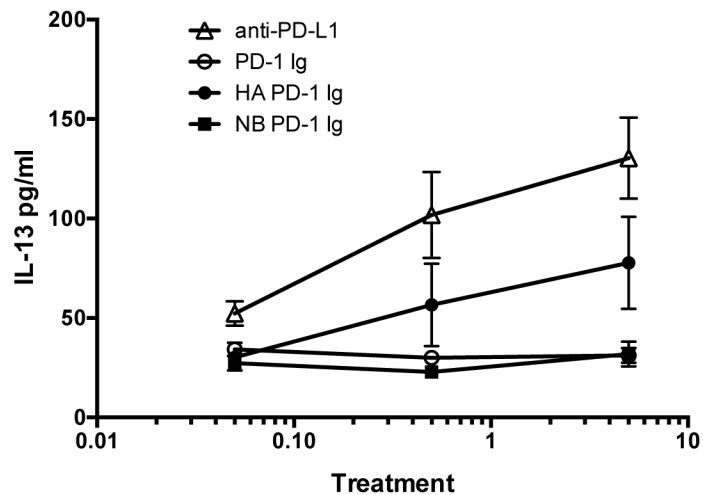

A

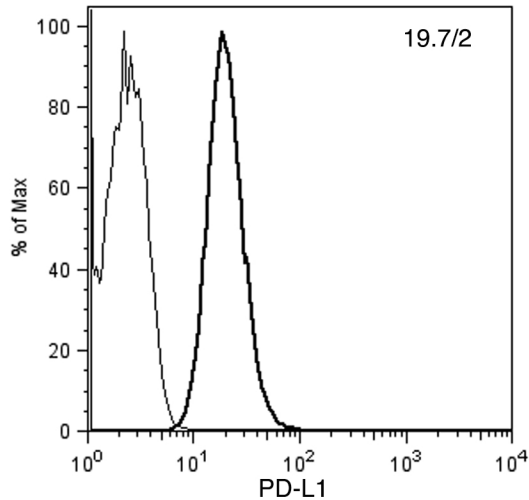

B

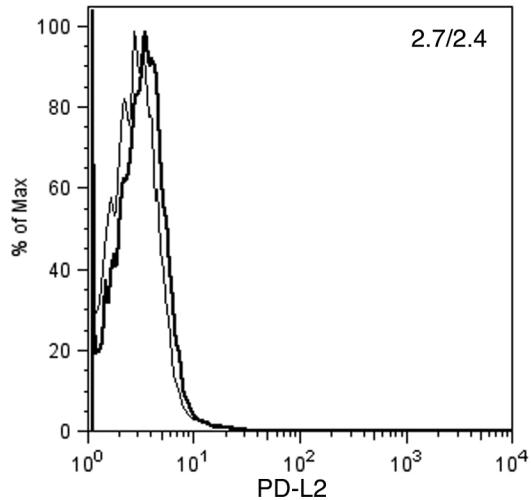

# Suppl Fig 9

## A

Gated on DC in the tumor

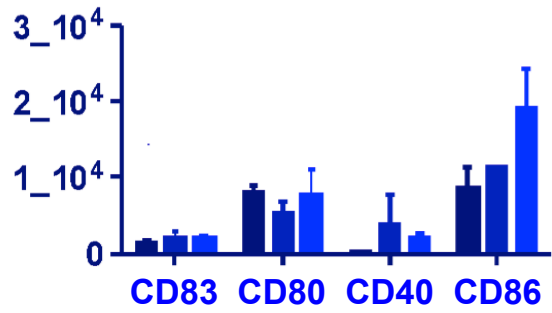

## B

PD-L1 expression in the tumor

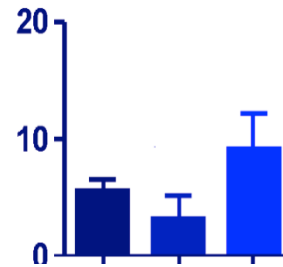

■ NT  
■ 20Gy x 3  
■ 20Gy x 3 + HA PD-1 Ig

## C

CD8 + TILs

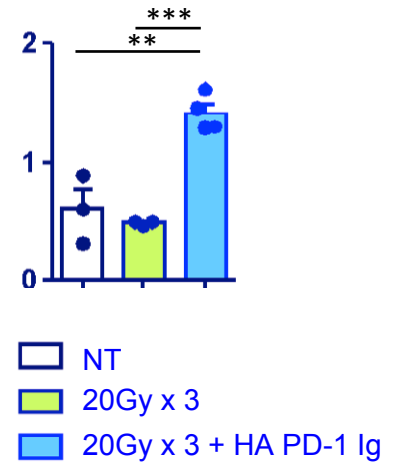

Supplement: mmc1.pdf [file mmc1.pdf]
